# Supplementary material
Source: MDPI journal article supplement (https://www.mdpi.com/2073-4352/14/1/40)
Supplement: s1 [file s1]

## Supporting Information

### A Foldable Metal-Organic Framework with cds Topology Assembled via Four-Connected Square-Planer Single Metal Ions Node and Linear Monodante Linker

Zhi-Chun Shi <sup>1</sup>, Xiaoliang Wang <sup>2</sup>, Vadym Drozd <sup>3</sup> and Raphael G. Raptis <sup>1,\*</sup>

<sup>1</sup> Department of Chemistry and Biochemistry, Florida International University, Miami, FL 33199, USA; zshi008@fiu.edu

<sup>2</sup> Department of Chemistry, Northwestern University, Evanston, IL 60208, USA; xiaoliang.wang@northwestern.edu

<sup>3</sup> Center for Study of Matter at Extreme Conditions, Florida International University, Miami, FL 33199, USA; drozdv@fiu.edu

\* Correspondence: rraptis@fiu.edu

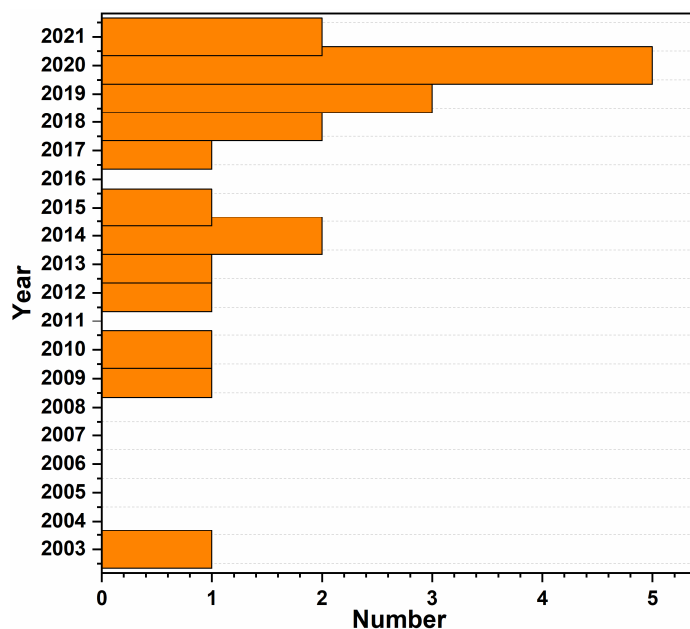

**Chart S1.** Publication record for MOFs with **cds** topology.

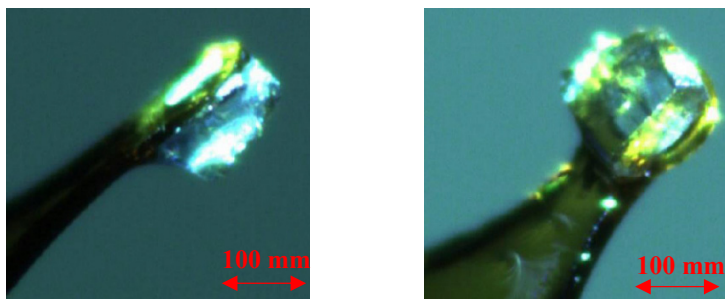

**Figure S1.** Photographs of the single crystal under white light from different directions.

FT-IR and Raman spectra were collected and compared with each other as **Figure S1** showing. The Ni–N (metal – ligand) stretching vibrations ( $A_g$  and  $B_{3u}$ ) are observed at  $295\text{ cm}^{-1}$  in Raman spectrum and absence in FT-IR spectrum. And the peaks in both FT-IR and Raman spectra near  $1610$  and  $1596\text{ cm}^{-1}$ , respectively, can be assigned to the C=N stretches. The stretches near  $375\text{ cm}^{-1}$  in Raman and FT-IR is attributed to the Ni–Cl stretch. The broad peaks in FT-IR near  $1050\text{ cm}^{-1}$  might be assigned to the complicated vibrational C=C bending and C–N stretch which were influenced by the pressure when preparing the testing sample, resulting in affect the distribution of energy levels. The peaks at  $1064\text{ cm}^{-1}$ ,  $928\text{ cm}^{-1}$  and  $621\text{ cm}^{-1}$  in FT-IR spectrum, and the peaks at  $906\text{ cm}^{-1}$  and  $639\text{ cm}^{-1}$  in Raman spectrum are attributed to the presence of perchlorate,  $\text{ClO}_4^-$ .

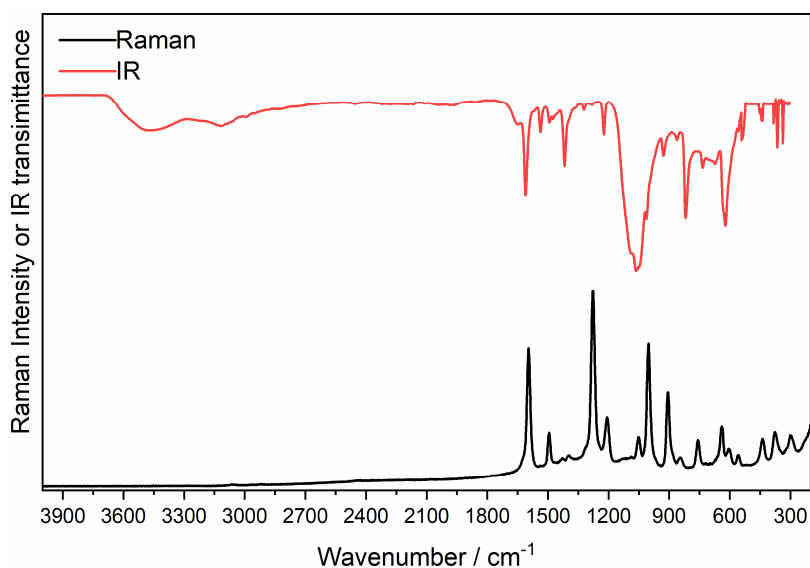

**Figure S2.** FT-IR and Raman spectra of compound **1**.

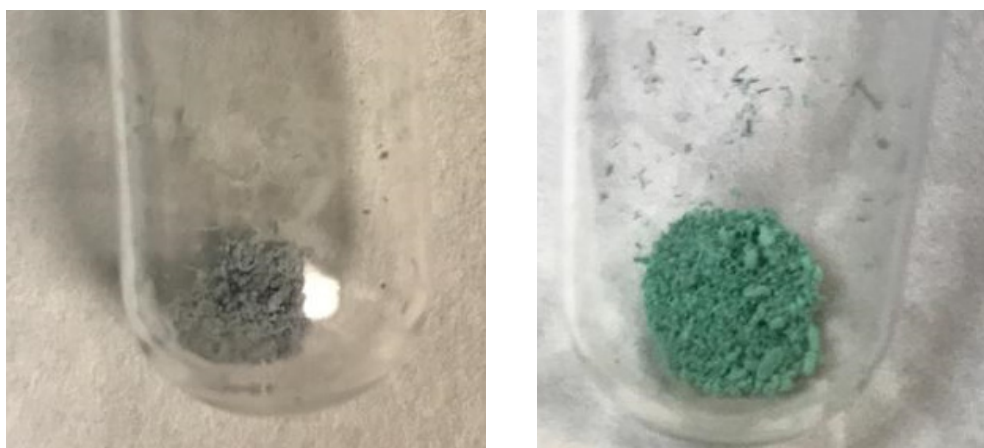

**Figure S3.** Photographs of **1** before (left) and after (right) activation.

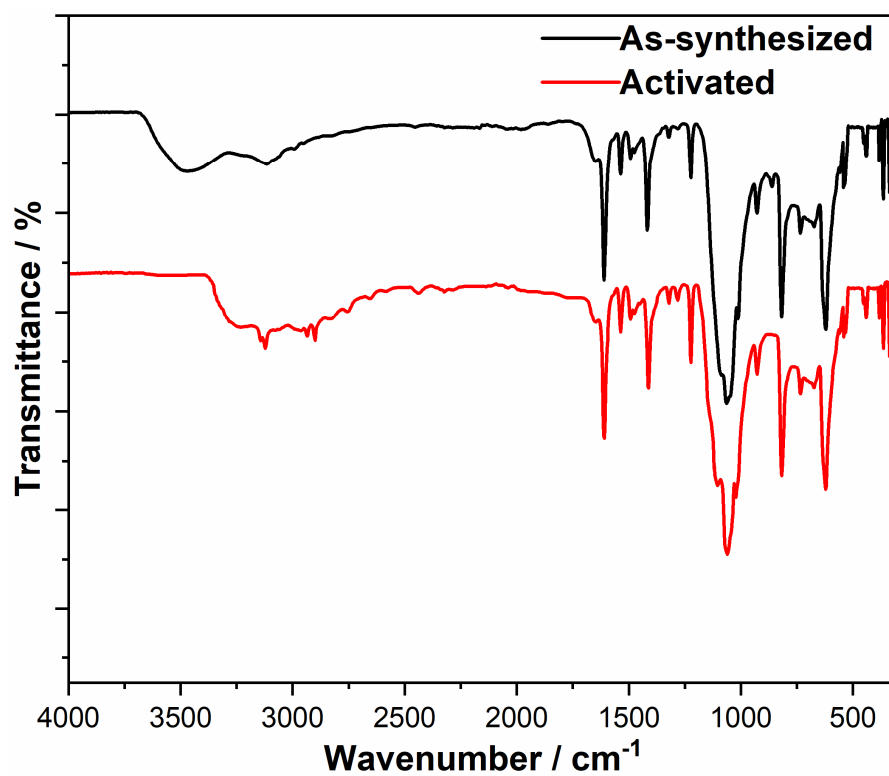

**Figure S4.** FT-IR spectra of **1** before and after activation.

**Table S1.** Selected bond length (Å) angle (°) for **1** at 172 K.

|                                      |            |                              |           |
|--------------------------------------|------------|------------------------------|-----------|
| Ni1—O1                               | 2.097 (7)  | Ni1—N1                       | 2.133 (4) |
| Ni1—O1 <sup>i</sup>                  | 2.097 (7)  | Ni1—N2                       | 2.12 (2)  |
| Ni1—N1 <sup>i</sup>                  | 2.133 (4)  | Ni1—N3                       | 2.10 (2)  |
| O1—Ni1—O1 <sup>i</sup>               | 179.4 (5)  | O1—Ni1—N1                    | 90.8 (2)  |
| O1—Ni1—N1 <sup>i</sup>               | 89.2 (2)   | O1 <sup>i</sup> —Ni1—N2      | 89.7 (3)  |
| O1 <sup>i</sup> —Ni1—N1 <sup>i</sup> | 90.8 (2)   | O1—Ni1—N2                    | 89.7 (3)  |
| O1 <sup>i</sup> —Ni1—N1              | 89.2 (2)   | N3—Ni1—O1                    | 90.3 (3)  |
| N1—Ni1—N1 <sup>i</sup>               | 177.5 (4)  | N3—Ni1—N1                    | 91.2 (2)  |
| N2—Ni1—N1 <sup>i</sup>               | 88.8 (2)   | N3—Ni1—N1 <sup>i</sup>       | 91.2 (2)  |
| N2—Ni1—N1                            | 88.8 (2)   | N3—Ni1—N2                    | 180.0     |
| N3—Ni1—O1 <sup>i</sup>               | 90.3 (3)   | Ni1—O1—H1A                   | 112.7     |
| C5—N1—Ni1                            | 121.1 (3)  | Ni1—O1—H1B                   | 114.0     |
| C1—N1—Ni1                            | 118.9 (3)  | C6—N2—Ni1                    | 124.2 (9) |
| C11 <sup>i</sup> —N3—Ni1             | 118.5 (1)  | C6 <sup>i</sup> —N2—Ni1      | 124.2 (9) |
| C11—N3—Ni1                           | 119 (1)    | Ni1—N2—C6—C7                 | 178 (1)   |
| Ni1—N1—C5—C4                         | 178.8 (5)  | Ni1—N3—C11—C10 <sup>iv</sup> | 179.7 (8) |
| Ni1—N1—C1—C2                         | −178.8 (5) |                              |           |

Symmetry codes: (i)  $-x-2, -y, z$ ; (ii)  $-x-3/2, -y+1/2, z$ ; (iii)  $x, -y, z-1/2$ ; (iv)  $x, -y, z+1/2$ .

**Table S2.** The EDS analysis of **1**.

| Element  | At. No. | Netto      | Mass [%]     | Mass Norm. [%] | Atom [%]      | Abs. error [%]<br>(1 sigma) | Rel. error [%]<br>(1 sigma) |
|----------|---------|------------|--------------|----------------|---------------|-----------------------------|-----------------------------|
| Carbon   | 6       | 25645      | 23.47        | 36.25          | 48.58         | 1.18                        | 5.27                        |
| Nitrogen | 7       | 4977       | 6.94         | 10.70          | 12.66         | 0.40                        | 5.46                        |
| Oxygen   | 8       | 29961      | 18.02        | 27.83          | 28.79         | 0.88                        | 4.99                        |
| Chlorine | 17      | 83139      | 10.02        | 15.47          | 7.22          | 0.31                        | 2.77                        |
| Nickel   | 28      | 8933       | 6.31         | 9.75           | 2.75          | 0.23                        | 3.66                        |
| Copper   | 29      | 7294       | 0.00         | 0.00           | 0.00          | 0.00                        | 0.00                        |
| Gold     | 79      | 15400      | 0.00         | 0.00           | 0.00          | 0.00                        | 0.00                        |
|          |         | <b>Sum</b> | <b>64.76</b> | <b>100.00</b>  | <b>100.00</b> |                             |                             |

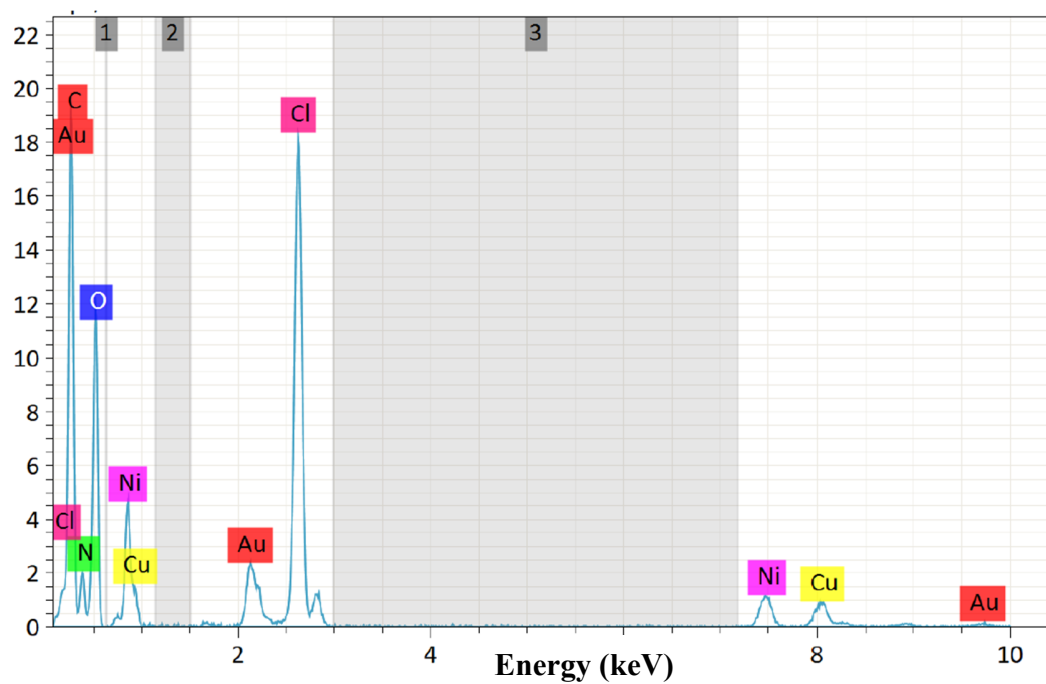

**Figure S5.** The EDS analysis for **1** (the presence of Cu is attributed to the Cu-based tape).

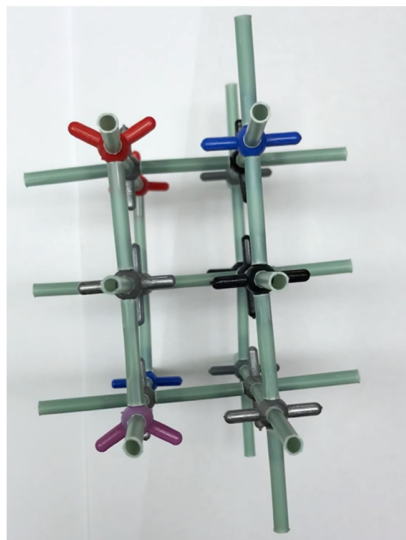

**Video S1.** Video of **1** collapsing/expanding along the  $a$ -axis, viewed parallel to the  $c$ -axis.

<https://youtube.com/shorts/ecfPHPMQpO8?feature=share>

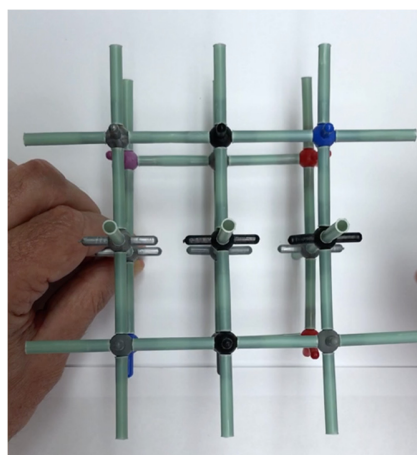

**Video S2.** Video of 2-D planes of **1** gliding along the  $b$ -axis, viewed parallel to the  $a$ -axis.

<https://youtube.com/shorts/htCFexBuzW4?feature=share>
